# Supplementary material for: High-temperature calcination enhances the activity of MnOx catalysts for soot oxidation
Source: Royal Society of Chemistry journal article supplement (doi:10.1039/d4cy00983e), 2024-01-01
Supplement: d4cy00983e1.pdf [file d4cy00983e1.pdf]

# High-temperature calcination enhances the activity of $\text{MnO}_x$ catalyst for soot oxidation

*Meng Wang<sup>a</sup>, Jingyi Wang<sup>a,c</sup>, Yan Zhang<sup>a,c\*</sup>, Yunbo Yu<sup>b,c</sup>, Wenpo Shan<sup>a,c\*</sup>*

<sup>a</sup> Institute of Urban Environment, Chinese Academy of Sciences, Xiamen 361021, China

<sup>b</sup> State Key Joint Laboratory of Environment Simulation and Pollution Control, Research Center for Eco-Environmental Sciences, Chinese Academy of Sciences, Beijing 100085, China

<sup>c</sup> University of Chinese Academy of Sciences, Beijing 100049, China

\* Corresponding Author: Yan Zhang (e-mail: yzhang3@iue.ac.cn)

Wenpo Shan (e-mail: wpsan@iue.ac.cn)

## Materials Preparation

In this work,  $\text{MnO}_x$  was synthesized via a hydrothermal method.  $\text{KMnO}_4$  (10.84 g) was dissolved in deionized water (200 ml), which was then added to a solution containing  $\text{MnAC}_2 \cdot 4\text{H}_2\text{O}$  (18.34 g), deionized water (40 mL) and glacial acetic acid (12.5 mL) with agitation. Then, the mixed solution was placed into a 500 mL Teflon-lined autoclave and maintained at 100 °C for 24 h. After that, the obtained black slurry was filtered, washed with deionized water and dried at 110 °C overnight. Finally, the sample was calcined in a furnace at 500 °C or 900 °C for 3 h, and the obtained catalysts were denoted as  $\text{MnO}_x$ -500 and  $\text{MnO}_x$ -900, respectively.

## Materials Characterization

X-ray powder diffraction (XRD) patterns of the as-prepared catalysts were measured on a X'Pert PRO instrument using  $\text{CuK}\alpha$  radiation ( $\lambda = 1.5406 \text{ \AA}$ ) at 40 kV and 40 mA. The diffractograms were taken over the  $2\theta$  range from 10° to 90°.

Thermogravimetric analysis experiment was carried out on a high temperature thermogravimetric analyzer (TGA/DSC1 Stare, Mettler Toledo, Switzerland).

$\text{H}_2$ -TPR was measured by a Micromeritics Auto Chem II 2920 automatic chemical adsorption analyzer. After pre-treatment under He at 300 °C for 1 h, 100 mg sample was heated from room temperature to 700 °C at a constant rate (10 °C/min) in a U-shaped quartz reactor under 10%  $\text{H}_2$ /Ar mixture gas (30 mL/min). The hydrogen consumption was monitored with a TCD detector calibrated by the signal obtained with the introduction of known amounts of hydrogen.

Raman spectra were recorded on a laser Raman spectrometer (LabRAM Aramis,

HORIBA Jobin Yvon, France) and excitation was provided by an He-Ne laser (532 nm).

The X-band electron paramagnetic resonance (EPR) spectra were recorded using an A300 spectrometer at - 196 °C.

X-ray photo electron spectroscopy (XPS) spectra of the catalysts were measured on a scanning X-ray micro probe (Axis Ultra, Kratos Analytical Ltd.) using Al K $\alpha$  radiation. All the binding energies were calibrated using the C 1s peak (BE = 284.6eV) as standard.

A Soot-TPR test was performed involving the thermal reduction of soot without gaseous oxygen in the same apparatus as that used for H<sub>2</sub>-TPR. The mixture of 10 mg soot and 100 mg catalyst under loose contact mode was pre-treated in He at 120 °C for 1 h, and then heated up from 30 to 1050 °C in Ar atmosphere. The productions of CO<sub>2</sub> were detected on line by a mass spectrometers (MS) with a quadrupole-type detector.

The EXAFS of Mn-K edges were tested in transmission mode at room temperature in the 1W1B beamline of Beijing Synchrotron Radiation Facility (BSRF). Before measurements, all samples were ground and then mixed with flour powder. The data analysis was carried out by the Athena analysis package.

### **DFT calculation**

DFT calculation was executed by Vienna Ab initio Simulation Package (VASP). Considering the strong correlation effect in transition metals, DFT+U was used to guarantee the reliability and precision of the calculation results. According to the XRD results and reported works<sup>1, 2</sup>, the (110) of  $\alpha$ -MnO<sub>2</sub>, (001) of  $\delta$ -MnO<sub>2</sub> and (111)

of  $Mn_2O_3$  were chosen to model the surface of  $\alpha$ - $MnO_2$ ,  $\delta$ - $MnO_2$  and  $Mn_2O_3$ . The energy calculation and convergence criteria optimization of the structure were set to force tolerances of  $1.0 \times 10^{-5}$  eV and  $0.02$  eV/Å, respectively. In addition, the vacuum thickness was set to be  $15$  Å. The formation energy of oxygen vacancy was calculated by the following expression.

$$E_{ov} = E_{slab\ ov} - E_{slab} + 1/2E_{O_2}$$

where  $E_{slab\ ov}$  is the amount of energy a system when it lacked one oxygen atom,  $E_{slab}$  is the energy of a normal body system, and  $E_{O_2}$  is the energy possessed by the system to adsorb an  $O_2$  molecule.

### Catalytic activity measurement

Soot oxidation activity was evaluated via TPO, which was carried out in a fixed-bed tubular quartz microreactor under the following reaction conditions: 0.1% NO (when used), 5%  $H_2O$  (when used), and 10%  $O_2$  balanced by  $N_2$ . The soot-catalyst mixture (100 mg of catalyst and 10 mg of soot) was prepared with loose contact. The outlet gases were monitored by an Antaris IGS gas analyzer (Thermo Fisher).

Soot conversion and  $CO_2$  selectivity were determined as follows:

$$\text{Soot conversion} = \frac{A_i}{A_t} \times 100\% \quad (1)$$

$T_{10}$ ,  $T_{50}$ , and  $T_{90}$  are defined as the temperatures achieving 10%, 50%, and 90% of soot conversion, respectively.

$$CO_2 \text{ selectivity} = \frac{A_{iCO_2}}{A_{iCO_2} + A_{iCO}} \times 100\% \quad (2)$$

$A_i$  is the total peak areas of  $\text{CO}_2$  and  $\text{CO}$  at a given temperature,  $A_t$  is the total peak areas of  $\text{CO}_2$  and  $\text{CO}$ ,  $A_{i\text{CO}_2}$  is the total peak areas of  $\text{CO}_2$  at a given temperature,  $A_{i\text{CO}}$  is the total peak areas of  $\text{CO}$  at a given temperature.

### The utilization efficiency of $\text{NO}_2$

The utilization efficiency of  $\text{NO}_2$  for the as-prepared catalysts was calculated by the following equation<sup>3</sup>:

$$\text{Efficiency of } \text{NO}_2 = \frac{(\text{CO}_2 + \text{CO})_{\text{in soot TPO}(\text{NO}/\text{O}_2)} - (\text{CO}_2 + \text{CO})_{\text{in soot TPO}(\text{O}_2)}}{(\text{NO}_2)_{\text{in NO TPO}} - (\text{NO}_2)_{\text{in soot TPO}(\text{NO}/\text{O}_2)}} \quad (\text{S1})$$

**Table S1** Textural Properties of the  $\text{MnO}_x$ -500 and  $\text{MnO}_x$ -900 catalysts

| Sample              | BET( $\text{m}^2/\text{g}$ ) | Pore vol ( $\text{mL}/\text{g}$ ) | Por diam (nm) |
|---------------------|------------------------------|-----------------------------------|---------------|
| $\text{MnO}_x$ -500 | 61.4                         | 0.42                              | 37.3          |
| $\text{MnO}_x$ -900 | 3.1                          | 0.01                              | 19.4          |

**Table S2** Curve-fitting results of Mn-K EXAFS for different samples

| Sample              | shell  | CN     | R( $\text{\AA}$ ) | R factor(%) |
|---------------------|--------|--------|-------------------|-------------|
| $\text{MnO}_x$ -500 | (Mn-O) | (4.22) | (1.89)            | 0.98        |
| $\text{MnO}_x$ -900 | (Mn-O) | (3.37) | (1.89)            | 0.78        |

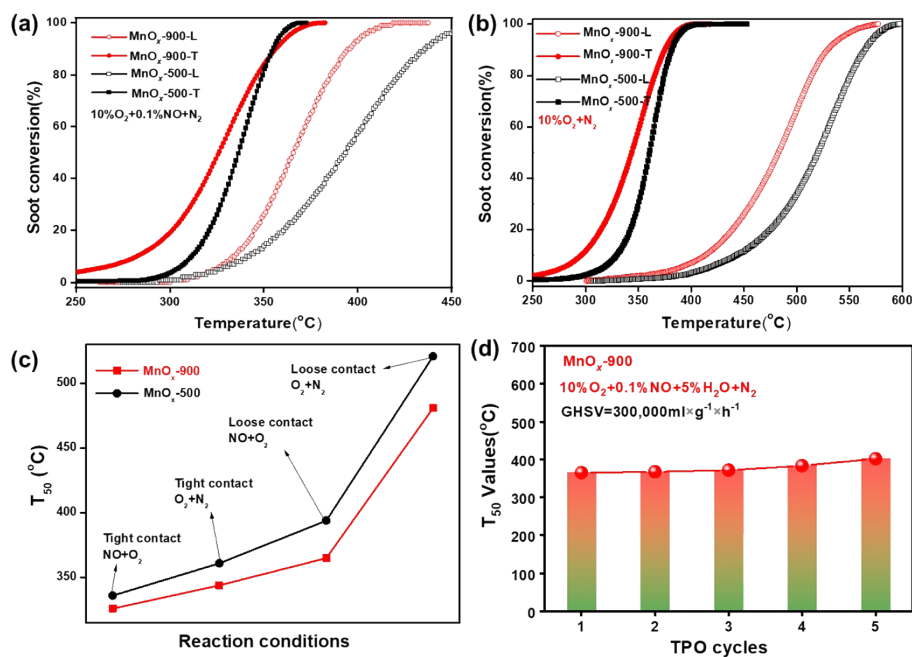

**Figure S1** Soot conversion over the MnO<sub>x</sub>-500 and MnO<sub>x</sub>-900 catalysts (a, b), the  $T_{50}$  values of the MnO<sub>x</sub>-500 and MnO<sub>x</sub>-900 catalysts in different reaction conditions (c), and the stability of the MnO<sub>x</sub>-900 catalyst in five soot-TPO cycles (d). Reaction conditions: 5% H<sub>2</sub>O (when used), 0.1% NO (when used), 10% O<sub>2</sub> balanced by N<sub>2</sub> under loose contact and heating rate = 2 °C/min.

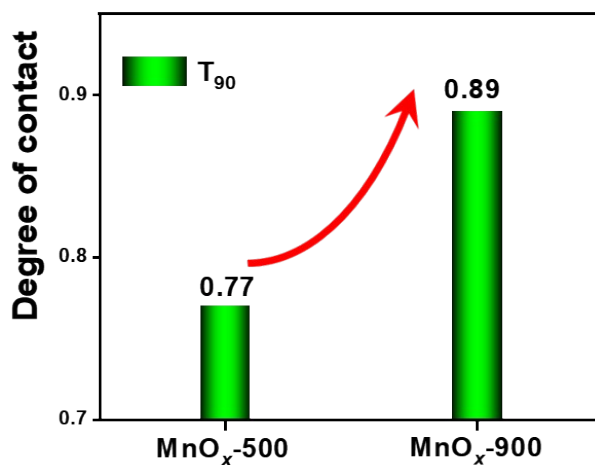

**Figure S2.** The contact efficiency of  $T_{90}$  for the as-prepared catalysts.

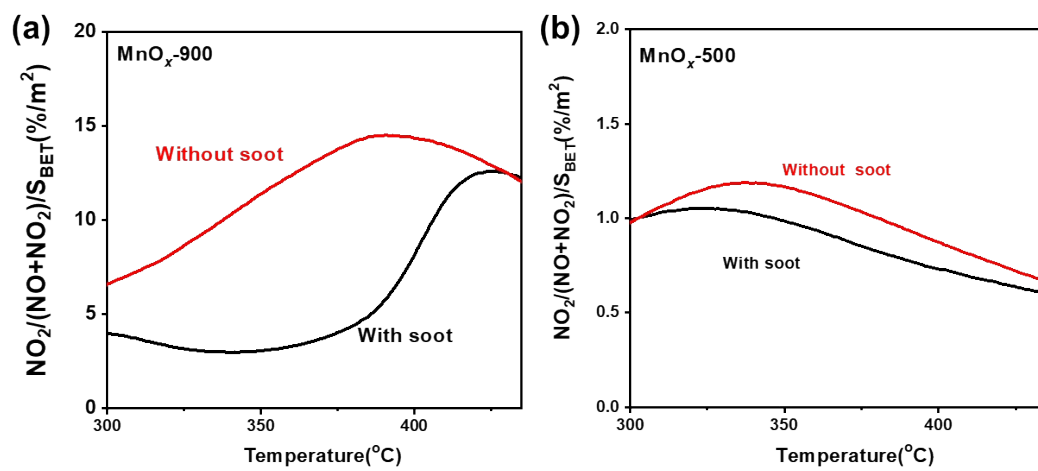

**Figure S3.** Specific activity of NO-to-NO<sub>2</sub> normalized by the specific surface area over the as-prepared catalysts in catalytic experiments performed with and without soot.

## REFERENCES

- 1 D. Yu, Y. Ren, X. Yu, X. Fan, L. Wang, R. Wang, Z. Zhao, K. Cheng, Y. Chen, Z. Sojka, A. Kotarba, Y. Wei, and J. Liu, Facile synthesis of birnessite-type  $K_2Mn_4O_8$  and cryptomelane-type  $K_{2-x}Mn_8O_{16}$  catalysts and their excellent catalytic performance for soot combustion with high resistance to  $H_2O$  and  $SO_2$ . *Appl. Catal. B: Environ.* 2021, **285**, 119779.
- 2 G. Zhu, J. Zhu, W. Jiang, Z. Zhang, J. Wang, Y. Zhu, and Q. Zhang, Surface oxygen vacancy induced  $\alpha$ - $MnO_2$  nanofiber for highly efficient ozone elimination. *Appl. Catal. B: Environ.* 2017, **209**, 729-737.
- 3 M. Zhao, J. Deng, J. Liu, Y. Li, J. Liu, Z. Duan, J. Xiong, Z. Zhao, Y. Wei, W. Song, and Y. Sun, Roles of surface-active oxygen species on 3DOM cobalt-based spinel catalysts  $M_xCo_{3-x}O_4$  (M = Zn and Ni) for  $NO_x$ -assisted soot oxidation. *ACS Catal.* 2019, **9**, 7548-7567.
